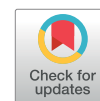

## Issues and Events

### NEW SPECIAL PODCAST: *DIABETES CARE* “ON AIR”

*Diabetes Care* “On Air” is the monthly podcast of the American Diabetes Association’s premier clinical research journal *Diabetes Care*. In each episode, co-hosts Alice Cheng, MD, FRCPC, and Michael Rickels, MD, MS, interview key authors of editor-selected feature articles and highlight the latest research presented in *Diabetes Care*. The podcast is intended for diabetes researchers and specialists, endocrinologists, and other health care professionals. Join Alice and Mike as they explore the latest high-impact research and information on diabetes care, treatment, and prevention. Access the most recent episode at [diabetesjournals.org/care/pages/diabetes\\_care\\_on\\_air](https://diabetesjournals.org/care/pages/diabetes_care_on_air).

### SPECIAL ARTICLE COLLECTION: NCCC REPORT TO CONGRESS

The National Clinical Care Commission (NCCC) was a federal advisory committee charged with leveraging federal policies and programs to more effectively prevent and control diabetes. In January 2022, the NCCC issued its final report to Congress. That transformational report contained 39 specific recommendations, including 3 foundational recommendations, that addressed the necessity of an all-of-government approach to diabetes, health equity, and access to health care. In a six-article collection published in the February issue of *Diabetes Care*, the NCCC shared those recommendations. Access the collection at [diabetesjournals.org/collection/1586/The-Clinical-Care-Commission-Report-to-Congress](https://diabetesjournals.org/collection/1586/The-Clinical-Care-Commission-Report-to-Congress).

### SUBMIT ARTWORK FOR THE COVER OF *DIABETES CARE*

If diabetes has had an impact on your life, whether you have diabetes or care for someone who has diabetes, please consider submitting your original artwork for publication on the cover of an issue of *Diabetes Care*. Artwork submission and selection are completely independent from manuscript submission and the peer review process—artwork sent for consideration on the cover is not required to be related to an article submitted to or published in the journal. *Diabetes Care* will consider images of artwork of any subject or medium.

For more information, please visit [diabetesjournals.org/care/pages/submit\\_a\\_cover\\_image](https://diabetesjournals.org/care/pages/submit_a_cover_image).

### STANDARDS OF CARE 2023 HIGHLIGHTS WEBCAST

The American Diabetes Association’s *Standards of Care in Diabetes—2023* ([diabetesjournals.org/care/issue/46/Supplement\\_1](https://diabetesjournals.org/care/issue/46/Supplement_1)) is based on a complete review of the relevant literature and is intended to provide clinicians, researchers, policy makers, and other interested individuals with the components of diabetes care, general treatment goals, and tools to evaluate the quality of care. The American Diabetes Association Professional Practice Committee updates the Standards of Care annually and strives to include discussion of emerging clinical considerations. In a special edition of “Diabetes Core Update,” American Diabetes Association’s Chief Scientific and Medical Officer, Robert Gabbay, MD, PhD, discusses the 2023 changes regarding cardiovascular risk reduction. To access the podcast, please visit [diabetesjournals.org/journals/pages/standards-of-care-2023](https://diabetesjournals.org/journals/pages/standards-of-care-2023).

### 83rd SCIENTIFIC SESSIONS

The 83rd annual American Diabetes Association Scientific Sessions will be held in San Diego, California, 23–26 June 2023, at the San Diego Convention Center. Registration and housing are now open. For information regarding the American Diabetes Association’s COVID-19 policy, travel and transportation, and more, please visit [professional.diabetes.org/scientific-sessions](https://professional.diabetes.org/scientific-sessions).

### SPECIAL PODCAST: DIABETES INPATIENT MANAGEMENT

A special episode of “Diabetes Core Update,” the American Diabetes Association podcast for primary care clinicians, highlights the research-to-practice article on effective inpatient diabetes management ([doi.org/10.2337/dsi22-0014](https://doi.org/10.2337/dsi22-0014)). Dr. Neil Skolnik is joined by Dr. Misha Zilbermint, who discusses innovations in technology, typical case studies, and practical strategies to tackle common challenges. For more information, please visit [diabetesjournals.org/journals/pages/diabetes-core-update-special-editions](https://diabetesjournals.org/journals/pages/diabetes-core-update-special-editions).

*Diabetes Care* (print ISSN 0149-5992, online ISSN 1935-5548) is owned, controlled, and published monthly by the American Diabetes Association, Inc., 2451 Crystal Drive, Suite 900, Arlington, VA 22202. *Diabetes Care* is a registered trademark of the American Diabetes Association. **Periodicals postage** paid at Arlington, VA, and additional mailing offices. **POSTMASTER:** Send all UAA to CFS (see DMM 507.1.5.2). **NON-POSTAL AND MILITARY FACILITIES:** Send address corrections to American Diabetes Association, Membership & Publication Operations, PO Box 37433, Boone, IA 50037-0433. Claims for missing issues should be made within 6 months of publication. The publisher expects to supply missing issues free of charge only when losses have been sustained in transit and when the reserve stock permits.
